# Supplementary material for: Polymorphism in a π stacked Blatter radical: structures and magnetic properties of 3-(phenyl)-1-(pyrid-2-yl)-1,4-dihydrobenzo[e][1,2,4]triazin-4-yl
Source: Royal Society of Chemistry journal article supplement (doi:10.1039/d0ce00789g), 2020-01-01
Supplement: d0ce00789g1.pdf [file d0ce00789g1.pdf]

# Polymorphism in a $\pi$ Stacked Blatter Radical: Structures and Magnetic Properties of 3-(Phenyl)-1-(pyrid-2-yl)-1,4-dihydrobenzo[*e*][1,2,4]triazin-4-yl

Christos P. Constantinides,<sup>\*,a</sup> Daniel B. Lawson,<sup>a</sup> Georgia A. Zissimou,<sup>b</sup> Andrey A. Berezin,<sup>b</sup> Aaron Mailman,<sup>c</sup> Maria Manoli,<sup>b</sup> Andreas Kourtellaris,<sup>b</sup> Gregory M. Leitus,<sup>d</sup> Rodolphe Clérac,<sup>e</sup> Heikki M. Tuononen,<sup>c</sup> and Panayiotis A. Koutentis<sup>b</sup>

<sup>a</sup> Department of Natural Sciences, University of Michigan-Dearborn, 4914 Evergreen Road, Dearborn, MI 48128-1491, United States. E-mail: [cconst@umich.edu](mailto:cconst@umich.edu) Fax: +01 3135934937 Tel: +01 3135836728

<sup>b</sup> Department of Chemistry, University of Cyprus, P.O. Box 20537, 1678 Nicosia, Cyprus

<sup>c</sup> Department of Chemistry, NanoScience Center, University of Jyväskylä, P. O. Box 35, FI-40014 Jyväskylä, Finland

<sup>d</sup> Chemical Research Support Unit, Weizmann Institute of Science, 7610001 Rehovot, Israel

<sup>e</sup> Univ. Bordeaux, CNRS, Centre de Recherche Paul Pascal, UMR 5031, 33600 Pessac, France

## Supplemental Information

|                                                                                                                                              |        |
|----------------------------------------------------------------------------------------------------------------------------------------------|--------|
| <b>Table T1</b> Crystallographic data for polymorphs <b>2<math>\alpha</math></b> and <b>2<math>\beta</math></b> .                            | Page 2 |
| <b>Fig. S1</b> Structure overlay of polymorphs <b>2<math>\alpha</math></b> and <b>2<math>\beta</math></b>                                    | Page 3 |
| <b>Fig. S2</b> Magnetic susceptibility measurements for all samples of polymorphs <b>2<math>\alpha</math></b> and <b>2<math>\beta</math></b> | Page 4 |

**Table 1.** Crystallographic data for polymorphs **2 $\alpha$**  and **2 $\beta$** .

|                                                                                  | <b>2<math>\alpha</math></b>                           | <b>2<math>\beta</math></b>                         |
|----------------------------------------------------------------------------------|-------------------------------------------------------|----------------------------------------------------|
|                                                                                  | <b>Crystal Data</b>                                   | <b>Crystal Data</b>                                |
| Formula                                                                          | C <sub>18</sub> H <sub>13</sub> N <sub>4</sub>        | C <sub>18</sub> H <sub>13</sub> N <sub>4</sub>     |
| Formula weight, g.mol <sup>-1</sup>                                              | 285.32                                                | 285.32                                             |
| Crystal system                                                                   | Orthorhombic                                          | Monoclinic                                         |
| Space group                                                                      | <i>P</i> 2 <sub>1</sub> 2 <sub>1</sub> 2 <sub>1</sub> | <i>P</i> -1 2 <sub>1</sub> / <i>c</i> <sub>1</sub> |
| <i>a</i> , <i>b</i> , <i>c</i> , Å                                               | 7.1656(3), 10.9705(4), 17.5843(6)                     | 19.7893(9), 3.76820(10), 19.7322(8)                |
| $\alpha$ , $\beta$ , $\gamma$ °                                                  | 90, 90, 90                                            | 90, 114.594(5), 90                                 |
| <i>V</i> , Å <sup>3</sup>                                                        | 1382.31(9)                                            | 1337.94(10)                                        |
| <i>Z</i>                                                                         | 4                                                     | 4                                                  |
| $\rho_{\text{calc}}$ , g.cm <sup>-3</sup>                                        | 1.371                                                 | 1.416                                              |
| $\mu$ (Mo Ka), mm <sup>-1</sup>                                                  | 0.671                                                 | 0.693                                              |
| <i>F</i> (000)                                                                   | 596                                                   | 596                                                |
| Crystal size, mm <sup>3</sup>                                                    | 0.224 × 0.053 × 0.035                                 | 0.193 × 0.085 × 0.026                              |
|                                                                                  | <b>Data Collection</b>                                | <b>Data Collection</b>                             |
| <i>T</i> , K                                                                     | 120.01(10)                                            | 120.00(10)                                         |
| $\lambda^{\text{a}}$ , Å                                                         | 1.54184                                               | 1.54184                                            |
| $\theta$ (min, max), °                                                           | 4.751, 74.490                                         | 4.500, 76.649                                      |
| Dataset (- <i>h</i> , <i>h</i> ; - <i>k</i> , <i>k</i> ; - <i>l</i> , <i>l</i> ) | -8, 7; -12, 13; -20, 21                               | -24, 23; -4, 2; -24, 24                            |
| Meas./ indep. refl. ( <i>R</i> <sub>int</sub> )                                  | 5012 / 2674 (0.0281)                                  | 9981 / 2797 (0.0267)                               |
| Obs. refl. [ <i>I</i> >2 $\sigma$ ( <i>I</i> )]                                  | 199                                                   | 199                                                |
|                                                                                  | <b>Refinement</b>                                     | <b>Refinement</b>                                  |
| <i>R</i> <sub>1</sub> <sup>b</sup>                                               | 0.0388                                                | 0.0418                                             |
| <i>wR</i> <sub>2</sub> <sup>c</sup>                                              | 0.1001                                                | 0.1196                                             |
| Goodness of fit on <i>F</i> <sup>2</sup>                                         | 1.040                                                 | 1.030                                              |
| Min, max resd density, e.Å <sup>-3</sup>                                         | -0.177/0.163                                          | -0.266/0.222                                       |

<sup>a</sup> Graphite monochromator.

<sup>b</sup>  $R_1 = \frac{\sum ||F_o| - |F_c||}{\sum |F_o|}$ .

<sup>c</sup>  $wR_2 = \frac{[\sum [w(F_o^2 - F_c^2)^2]]^{1/2}}{[\sum [wF_o^2]]^{1/2}}$ ,  $w = 1/[\sigma^2(F_o^2) + (m \cdot p)^2 + n \cdot p]$ ,  $p = [\max(F_o^2, 0) + 2F_c^2]/3$ .

**Fig. S1** Structure overlay of polymorphs **2 $\alpha$**  and **2 $\beta$**  (polymorph **2 $\alpha$**  with red capped sticks and polymorph **2 $\beta$**  with blue capped sticks).

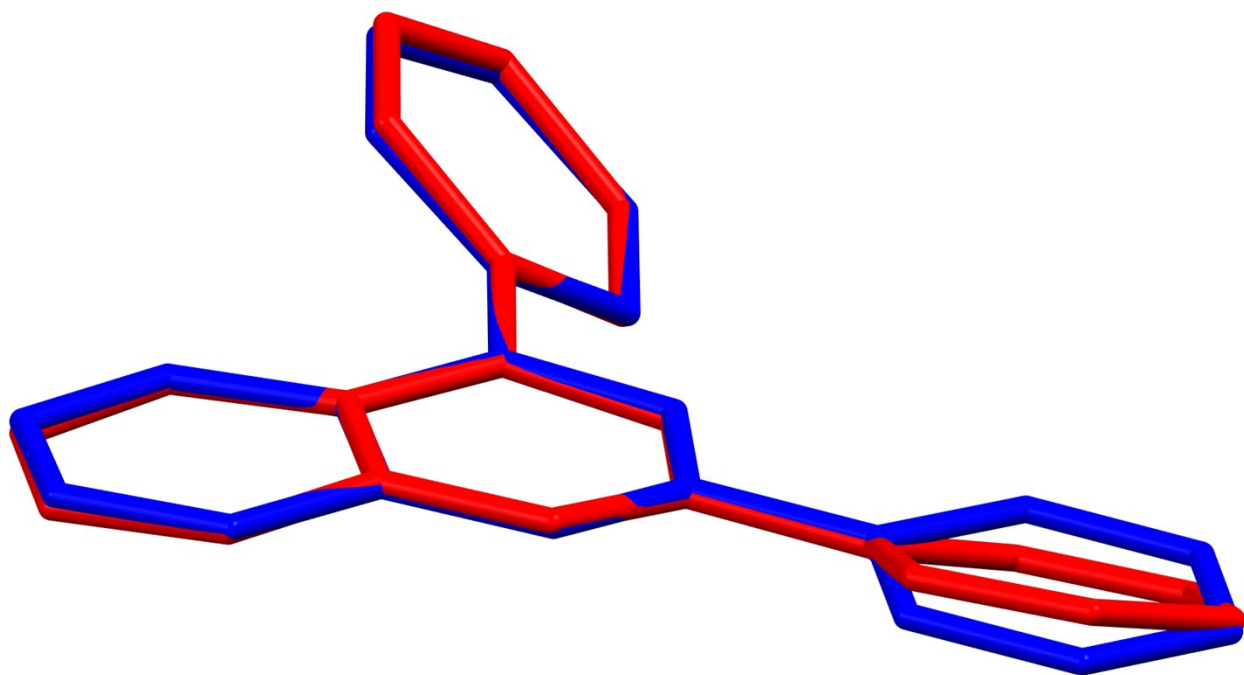

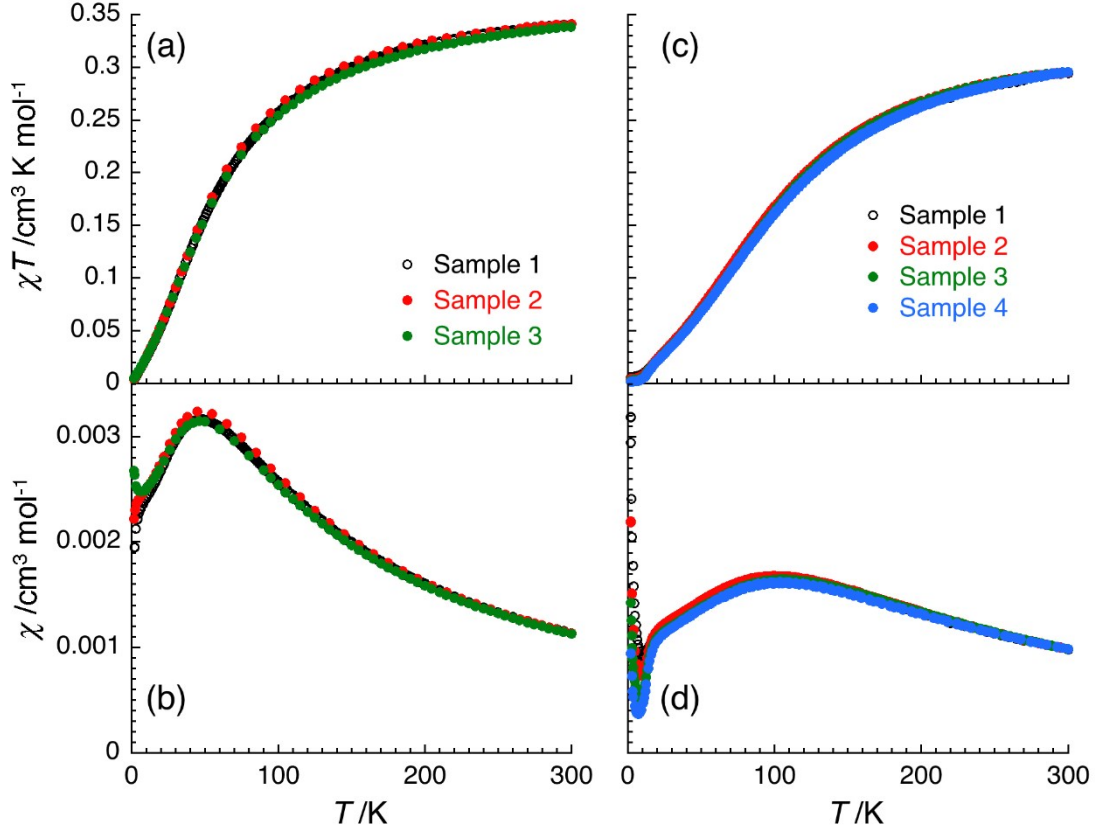

**Fig. S2** Temperature dependence of (bottom) the magnetic susceptibility and (top) the  $\chi T$  product for polymorphs (left; at 0.5 T for sample 1 and 0.1 T for sample 2)  $2\alpha$  and (right; at 0.1 T for sample 1; at 0.5 T for samples 2, 3 and 4)  $2\beta$  ( $\chi$  is defined as  $M/H$  per mole of radical  $2$ ). The best fit of the experimental data to the regular chain model of antiferromagnetically coupled quantum spins (see main text) leads for  $2\alpha$  to  $J/k_B = -36.7(3)$  K ( $-25.5(2)$   $\text{cm}^{-1}$ ; between 300 and 15 K) for sample 1,  $J/k_B = -35.6(3)$  K ( $-24.7(2)$   $\text{cm}^{-1}$ ; between 300 and 14 K) for sample 2,  $J/k_B = -36.9(3)$  K ( $-25.6(2)$   $\text{cm}^{-1}$ ; between 300 and 16 K) for sample 3; and for  $2\beta$  to  $J/k_B = -72(3)$  K ( $-50(2)$   $\text{cm}^{-1}$ ; between 300 and 20 K) for sample 1,  $J/k_B = -70(3)$  K ( $-49(2)$   $\text{cm}^{-1}$ ; between 300 and 20 K) for sample 2,  $J/k_B = -72(3)$  K ( $-50(2)$   $\text{cm}^{-1}$ ; between 300 and 20 K) for sample 3 and,  $J/k_B = -73(3)$  K ( $-51(2)$   $\text{cm}^{-1}$ ; between 300 and 20 K) for sample 4 (with a fixed  $g$  factor of 2.05(5))
